Urol Int , DOI: 10.1159/000552660

Received: February 10, 2026

Accepted: May 13, 2026

Published online: June 12, 2026

## **Precision Nodal Staging in Intermediate-Risk Prostate Cancer: A Narrative Review of Molecular Imaging**

Shen B, Wang F

ISSN: 0042-1138 (Print), eISSN: 1423-0399 (Online)

<https://www.karger.com/UIN>

Urologia Internationalis

**Disclaimer:**

Accepted, unedited article not yet assigned to an issue. The statements, opinions and data contained in this publication are solely those of the individual authors and contributors and not of the publisher and the editor(s). The publisher and the editor(s) disclaim responsibility for any injury to persons or property resulting from any ideas, methods, instructions or products referred to the content.

**Copyright:**

© 2026 S. Karger AG, Basel

**Review Article**

***Precision Nodal Staging in Intermediate-Risk Prostate Cancer: A Narrative Review of Molecular Imaging***

Banchao Shen<sup>a, b</sup>, Fuli Wang<sup>a</sup>

<sup>a</sup> Department of Urology, Xijing Hospital, Air Force Medical University, Xi'an, Shaanxi, 710032, China

<sup>b</sup> Department of Urology, No.988 Hospital of Joint Logistic Support Force, Zhengzhou, Henan, 450042, China

Short Title: Precision Nodal Staging for Intermediate-Risk Prostate Cancer

Corresponding Author:

Fuli Wang

E-mail address: [wangfuli98@163.com](mailto:wangfuli98@163.com)

Keywords: Prostate cancer; Lymph node staging; Molecular imaging; PSMA-PET/CT; Sentinel lymph node biopsy

## **Abstract**

### **Background**

Lymph node (LN) staging remains critical for risk stratification and treatment selection in intermediate-risk prostate cancer. Conventional imaging modalities have limited sensitivity, and extended pelvic LN dissection (ePLND) is associated with considerable morbidity.

### **Summary**

This narrative review evaluates conventional imaging, molecular imaging, and intraoperative technologies for LN staging in intermediate-risk prostate cancer. Conventional computed tomography and magnetic resonance imaging demonstrate low sensitivity for detecting lymph node metastasis. Prostate-specific membrane antigen (PSMA) positron emission tomography/computed tomography shows substantially improved diagnostic performance; however, it may still underestimate micrometastatic disease. Intraoperative approaches, including PSMA-targeted fluorescence imaging and sentinel lymph node biopsy, enable real-time detection and may reduce morbidity while maintaining high diagnostic accuracy in experienced centers. However, these techniques are limited by technical complexity, lack of standardized protocols, and restricted availability in routine clinical practice.

### **Key Messages**

A multimodal, risk-adapted strategy combining preoperative molecular imaging and intraoperative targeted techniques may improve the precision of LN staging. This integrated approach can help minimize unnecessary ePLND and reduce procedure-related morbidity in patients with intermediate-risk prostate cancer.

## Introduction

Prostate cancer (PCa) is the second most common cancer among men worldwide [1, 2], and accurate nodal staging is critical for prognosis and treatment planning [3]. Pelvic lymph node (LN) dissection (PLND) remains the gold standard for detecting LN metastasis (LNM) [4], although its use varies according to risk stratification. Current guidelines recommend omitting PLND in low-risk patients [5, 6], in whom nodal involvement is rare and active surveillance is often appropriate. Conversely, extended PLND (ePLND) is for high-risk patients despite its considerable morbidity rate of 19.8% [4, 7].

However, this risk-adapted approach leaves the intermediate-risk subgroup (International Society of Urological Pathology [ISUP] Grade Group 2–3, prostate-specific antigen [PSA] 10–20 ng/mL, and clinical Stage cT1–2b) in a therapeutic gray zone [8, 9]. Intermediate-risk prostate cancer (IR-PCa) is the most biologically heterogeneous category and is further classified into favorable (ISUP Grade Group 2, PSA <10 ng/mL, cT1–2a) and unfavorable (ISUP Grade Group 3 or PSA 10–20 ng/mL with cT1–2b) subgroups [7, 10]. Favorable cases resemble low-risk disease, with <10% nodal involvement, whereas unfavorable cases exhibit 15%–20% LNM rates and often harbor occult high-grade disease [9]. This marked heterogeneity within a single risk category creates a critical clinical dilemma: the “intermediate-risk” label encompasses both indolent tumors amenable to active surveillance and aggressive disease requiring multimodal therapy, thereby risking overtreatment in favorable subgroups and undertreatment in unfavorable ones. Risk stratification nomograms suggest a 7% LNM threshold; patients with favorable IR-PCa below this threshold may safely omit dissection, whereas those with unfavorable IR-PCa typically exceed it and warrant definitive staging [11]. However, accurate differentiation between these subgroups depends on reliable detection of nodal metastases, which remains challenging with current imaging modalities. Conventional imaging techniques have notable limitations. Computed tomography (CT) and magnetic resonance imaging (MRI) demonstrate limited sensitivity for LNM (typically <40% for sub-centimeter disease) [12, 13], as they rely on size-based criteria that fail to detect micrometastases in morphologically normal nodes. Prostate-specific membrane antigen positron emission tomography/computed tomography (PSMA-PET/CT) improves detection, with size-dependent sensitivity ranging from 50% to 90%; however, it still misses a substantial proportion of micrometastases within standard dissection fields (up to 63%) [14, 15]. These limitations have driven the development of next-generation molecular imaging approaches, ranging from preoperative PSMA-PET/CT to intraoperative fluorescence guidance and sentinel lymph node (SLN) mapping.

Therefore, this narrative review aims to synthesize current evidence addressing the following key questions: How can molecular imaging improve the detection accuracy of pelvic LNM in IR-PCa? What are the complementary roles of preoperative and intraoperative modalities? How can these technologies be integrated to enable precision nodal staging while minimizing overtreatment? We first examine the limitations of conventional imaging, then assess advances in PSMA-targeted diagnostics and intraoperative guidance, and finally propose a multimodal framework for risk-adapted nodal staging while identifying priorities for future research.

### Literature Selection Strategy

This narrative review employed purposive sampling to identify pivotal advances in PCa nodal staging, prioritizing clinical impact over exhaustive enumeration [16].

A systematic search was conducted in PubMed and the Web of Science Core Collection using combinations of the following keywords: (“prostate cancer” OR “prostatic neoplasm”) AND (“lymph node metastasis” OR “lymph nodal staging”) AND (“PSMA-PET” OR “fluorescence imaging” OR “sentinel” OR “CT” OR “MRI” OR “molecular imaging”). The search was restricted to studies published between January 2015 and December 2025, corresponding to the clinical implementation of PSMA-targeted imaging.

We included original research that: (1) evaluated the diagnostic accuracy of novel imaging modalities using histopathology as the reference standard; (2) introduced intraoperative molecular guidance technologies with clinical validation; or (3) provided head-to-head comparisons of staging strategies. Eligible study designs included diagnostic accuracy trials, prospective cohort studies, and key clinical investigations assessing nodal staging performance. We excluded non-human studies, non-English publications, and studies focused on biochemical recurrence or treatment of PCa. Details of the screening process are presented in **Figure 1**.

This selection process yielded a core set of 61 key studies that form the evidentiary foundation of this review. Collectively, these studies delineate the evolution of the clinical workflow for nodal staging, which structures our discussion into three domains: (1) the diagnostic limitations of conventional imaging; (2) the paradigm shift in preoperative molecular staging; and (3) the emergence of intraoperative navigational guidance for targeted dissection.

### Limitations of Conventional Imaging Modalities

Traditional imaging modalities, such as CT, are routinely used for whole-body staging in PCa and provide preliminary morphological assessment of LNs. However, they rely solely on morphometric criteria—typically a short-axis diameter of more than 8–10 mm—to define pathological LNs [17]. This size-based approach fundamentally limits the detection of micrometastases in normal-sized LNs, resulting in insufficient sensitivity for accurate LNM detection. Notably, CT cannot reliably distinguish between enlarged benign hyperplastic nodes and malignant metastatic nodes, a limitation that is particularly pronounced in patients with small, low-aggressiveness prostate tumors. Consequently, the sensitivity of CT alone for identifying LNM is consistently reported to be below 40% in clinical studies [12].

Compared with CT, MRI offers superior soft-tissue contrast, enabling clearer visualization of the anatomical relationship between the prostate and surrounding LNs, as well as more accurate assessment of locoregional tumor spread [17]. This represents a significant advantage of MRI over CT in PCa staging. Despite this improvement, MRI remains limited by its reliance on morphological criteria, and its diagnostic accuracy for nodal staging is not substantially better than that of CT. A systematic review of five studies ( $n = 228$ ) demonstrated that MRI detected only 25% of pathologically confirmed LNMs, corresponding to a 75% false-negative rate for nodal disease [18]. Multiparametric MRI is primarily used for local tumor staging, evaluation of extraprostatic extension, and assessment of adjacent structures, as well as detection of distant metastases [19]. Nevertheless, these advances have not translated into improved sensitivity for LNM detection, as nodal assessment continues to depend on size-based evaluation. These persistent limitations indicate that even advanced conventional imaging techniques cannot achieve the diagnostic precision required for reliable nodal staging of PCa.

To address the inherent limitations of morphology-based imaging, radiomics—a computational approach that extracts quantitative texture features from multiparametric MRI images has been explored to improve nodal assessment. However, current evidence demonstrates variability in diagnostic performance, with sensitivity ranging from 50% to 93% and specificity ranging from 29% to 86% for detecting metastases in normal-sized LNs [20]. This heterogeneity is largely attributable to the lack of standardized imaging acquisition and feature extraction protocols, as well as the limited availability of high-quality clinical studies, which restricts its clinical applicability. Collectively, these limitations indicate that even advanced conventional and computational imaging techniques cannot overcome the fundamental constraints of morphology-based assessment, underscoring the need for molecular imaging approaches. To overcome these limitations, next-generation imaging (NGI) techniques, particularly molecular imaging, offer a more sensitive and less invasive strategy for detecting LNM.

### **Molecular Imaging for Preoperative Staging**

NGI, represented by molecular imaging, has triggered a paradigm shift in preoperative nodal staging. Among various NGI techniques, PET/CT using novel tracers has significantly improved the accuracy of LNM detection, with PSMA-based PET imaging being the most extensively studied and widely applied [21]. As the most sensitive method currently available for identifying metastatic spread, PSMA-PET is primarily used for preoperative nodal staging and the detection of postoperative recurrence in patients with PCa [22]. Clinically, the use of PSMA-PET has been progressively standardized. Between 2020 and 2021, the US Food and Drug Administration approved two PSMA-based tracers for clinical use, namely gallium-68 PSMA-11 ( $^{68}\text{Ga}$ -PSMA-11) [14] and Piflufolastat F-18 ( $^{18}\text{F}$ -DCFPyL) [23], establishing a foundation for broader clinical adoption.

The superior diagnostic performance of PSMA-PET/CT in pelvic LNM staging is attributed to its molecular targeting capability, which enables specific recognition of PSMA-expressing metastatic lesions. This approach significantly enhances detection efficiency, offering higher sensitivity and specificity compared with conventional imaging modalities. A prior study demonstrated that PSMA-PET/CT outperformed conventional imaging, achieving an accuracy of 92% versus 65% [24]. Additionally, pooled analyses from multiple studies have reported sensitivity ranging from 47.7% to 95.2% and specificity ranging from 89.9% to 100% [14, 24], reflecting considerable heterogeneity across study designs and patient populations. Conversely, a prospective multicenter Phase III trial reported a sensitivity of 40% (95% confidence interval: 34–46%) in intermediate- and high-risk patients [25], highlighting the discrepancy between optimized single-center results and real-world multicenter performance. This variability is influenced by multiple factors that have been further clarified in subsequent studies and clinical guidelines.

To address this heterogeneity and improve diagnostic consistency, four key influencing factors have been identified: (1) tracer type— $^{68}\text{Ga}$ -PSMA-11,  $^{18}\text{F}$ -DCFPyL, and  $^{18}\text{F}$ -PSMA-1007 differ in diagnostic performance [14, 26, 27]; (2) imaging protocol—reconstruction algorithms, delayed imaging, and administration parameters significantly affect lesion detectability [27]; (3) patient selection—unfavourable disease status and higher tumor burden are associated with increased likelihood of metastasis and improved detection rates [14, 24]; and (4)

lesion biology—PSMA expression correlates with tumor grade, while nonspecific uptake in benign conditions may reduce specificity [26-29]. As these factors are largely related to nonstandardized practices and biological variability, clinical standardization represents the primary strategy to reduce heterogeneity [25, 30]. Standardization should follow established guidelines (e.g., European Association of Urology [EAU] recommendations), including standardized tracer production, clearly defined patient selection criteria, and incorporation of biological context into image interpretation to minimize interinstitutional variability [25, 27, 30]. Beyond these standardization-related challenges, PSMA-PET/CT has inherent clinical limitations that constrain its widespread adoption.

Practical barriers—an important aspect of clinical limitations—significantly limit the accessibility of PSMA imaging. The high cost of PSMA tracers, along with the uneven distribution of technical resources, limits their availability in non-specialized regions with limited medical infrastructure [30]. In addition, false-positive findings may occur due to nonspecific PSMA uptake in benign conditions such as inflammatory LNs, complicating clinical interpretation and reducing overall diagnostic reliability [28, 29].

In summary, despite its limitations, PSMA-PET/CT is a valuable tool for preoperative pelvic LNM staging in PCa, improving staging accuracy and supporting individualized treatment planning [22, 30]. However, as a preoperative modality, it does not fully address discrepancies between preoperative imaging findings and intraoperative pathological assessment, leaving an important unmet clinical need. To bridge this gap, intraoperative navigation techniques have been developed.

### **Molecular Imaging for Intraoperative Staging: Navigational Guidance**

NGI, extending from preoperative molecular imaging to the intraoperative setting, has driven the development of navigational guidance for real-time LNM targeting. Fluorescence-based molecular probe technology serves as the core translational tool in this domain.

#### **Near-Infrared-I Fluorescence Agents (700–1000 nm)**

Fluorescence-guided surgery (FGS) enables real-time intraoperative visualization through the detection of target-specific fluorescent agents within the surgical field. Near-Infrared-I (NIR-I) fluorescence imaging is currently the most clinically advanced modality. It provides real-time intraoperative imaging that complements preoperative radionuclide NGI, reduces tissue autofluorescence interference, and improves the tumor-to-background ratio [31]. Specifically, it enables intraoperative real-time visualization of LNMs, facilitates precise resection, and helps address discrepancies between preoperative imaging and intraoperative findings—a key limitation of preoperative PSMA-PET/CT. The diagnostic performance of intraoperative fluorescence guidance depends on the selective accumulation and effective concentration of fluorescent dyes within metastatic LNs [31].

Indocyanine green (ICG), with an absorption peak at 780 nm and an emission peak at 820 nm, is one of the few US Food and Drug Administration-approved optical agents with clinical utility [31]. ICG-based imaging systems can achieve micron-scale spatial resolution (<10  $\mu\text{m}$ ) [32], enabling potential differentiation between malignant and benign LNs and providing value for intraoperative margin assessment [33]. However, as a nonspecific fluorescent agent, ICG lacks standardized preoperative and intraoperative dosing protocols. Moreover, its diagnostic performance for PCa LNM detection remains suboptimal, with a reported sensitivity of 62%, specificity of 50%, positive predictive value (PPV) of 45%, and negative predictive value (NPV) of 97% [34].

To overcome the low specificity of non-targeted agents such as ICG and improve the accuracy of LNM detection, PSMA-targeted fluorescent probes have been developed for PCa. (1) IS-002, a NIR fluorophore-labeled PSMA-targeting peptide, is among the first NIR tracers translated into human application. It can identify PCa lesions undetectable by conventional white-light imaging and demonstrates a 90% concordance rate with histopathological findings [35]. (2) OTL78 exhibits high diagnostic accuracy for PSMA-positive lesions due to its strong affinity for PSMA and has shown reliable performance in confirming negative surgical margins [36]. Despite these advantages, clinical studies of PSMA-targeted fluorescent agents have reported inconsistent diagnostic sensitivity [32, 37-40].

To address these limitations, dual-modality probes combining radioactive and fluorescent targeting have been developed, integrating the advantages of preoperative nuclear NGI with intraoperative fluorescence imaging [41]. These probes enable preoperative lesion localization *via* nuclear imaging and real-time intraoperative identification of diseased LNs, facilitating a seamless workflow from staging to surgical guidance. For example, the dual-targeting probe Cy-KUE-OA [42] demonstrates a 13.2-fold increase in fluorescence intensity compared with single-modality probes, enabling precise localization of PCa foci and metastatic LNs and improving intraoperative staging accuracy. In a first-in-human study of a dual-modality PSMA-targeted probe ( $^{68}\text{Ga}$ -P3), intraoperative fluorescence imaging achieved a maximum accuracy of 92.3% at a dose of 40  $\mu\text{g}/\text{kg}$ , with an NPV of 100% for

tumor localization [43]. Notably, preoperative risk stratification can guide the application of these probes to suspicious nodal regions, representing a shift from anatomy-based to biologically guided PLND. However, single-modality PSMA-targeted fluorescent agents and dual-modality probes share several clinical and technical limitations. Clinically, their use is constrained by the lack of standardized dosing protocols, variability in intraoperative visualization and operator technique, high development and implementation costs, limited patient acceptance, and insufficient high-quality clinical evidence [32, 36, 37, 40]. Technically, as NIR-I agents, both types of probes are limited by shallow tissue penetration (<10 mm) [41], restricting visualization of deep pelvic LNs and limiting their utility for LNM staging. This limitation has motivated the development of NIR-II fluorescence agents.

### **Near-infrared-II Fluorescence Agents (1000–1700 nm)**

NIR-II fluorescence imaging has gained increasing attention in biomedical research, with significant potential for clinical translation due to its unique advantages, including reduced light scattering, deeper tissue penetration, higher spatial resolution, and superior signal-to-noise ratio [44, 45]. Photoluminescent nanomaterials (PLNs) emit light without continuous external excitation. When combined with multimodal imaging strategies, NIR-II PLNs enable the development of high-performance targeted probes. Multimodal imaging integrates the complementary strengths of different imaging modalities to achieve high sensitivity and high spatial resolution for lesion detection [46].

Preclinical proof-of-concept studies in animal models have demonstrated the translational potential of NIR-II probes, enabling detection of submillimeter tumors (<2 mm) that are not visible to the naked eye and suggesting their potential utility for intraoperative navigation [48]. However, clinical translation remains in its early stages. At present, NIR-II probes for PCa LNM are largely confined to preclinical research, with no large-scale clinical trials or regulatory approvals to date [47]. In contrast, most clinical intraoperative fluorescence studies in PCa continue to rely on NIR-I agents [32, 34]. Nevertheless, the high-precision targeted imaging paradigm established by current fluorescence-guided approaches provides a valuable translational framework for the future development of NIR-II probes for LNM detection and intraoperative FGS in PCa.

In summary, NIR-II fluorescence probes have demonstrated significant advantages in preclinical studies and show great potential for intraoperative navigational guidance. However, they still share many of the limitations of NIR-I agents. Overcoming these challenges, conducting high-quality clinical studies, and establishing clinical consensus remain key priorities for realizing the full clinical value of NIR-II fluorescence imaging in PCa LNM.

### **Sentinel Lymph Node Biopsy Integrated with Molecular Imaging**

In PCa, SLN biopsy (SLNB) is used to improve staging accuracy and enable resection of metastatic lesions, including micrometastases. Studies have shown that SLNB can achieve diagnostic accuracy comparable to ePLND in selected cohorts [40, 48]. However, these findings require further validation in larger, standardized studies before SLNB can be considered an equivalent alternative in routine clinical practice. When combined with molecular imaging, SLNB offers a targeted, minimally invasive approach for nodal staging in PCa, with distinct advantages over traditional intraoperative navigation techniques. Technically, it enables precise localization of the first-echelon LNs draining the primary tumor through molecular imaging-based lymphatic mapping, thereby avoiding blind pelvic LN exploration and improving surgical targeting [49]. Clinically, SLNB reduces the extent of surgical dissection while ensuring detection of metastatic LNs, thereby lowering the risk of complications such as lymphocele and lower limb lymphedema associated with ePLND [50].

These advantages support the clinical value of SLNB combined with molecular imaging, as reflected in international guidelines and emerging clinical evidence. The 2025 EAU Prostate Cancer Guidelines (Section 5.8.2.6.3) recognize SLNB as a clinically validated, minimally invasive option for intermediate- and high-risk patients, citing high diagnostic performance (sensitivity 95.2%, NPV 98.0% in a systematic review [40]; sensitivity 95.4%, specificity 100% in the prospective SENTINELLE trial [7]). This reflects its transition from investigational use toward broader clinical adoption in specialized centers with appropriate expertise, while ePLND remains the recommended standard.

Notably, SLNB occupies different positions across clinical guidelines. While it is no longer considered experimental in centers following EAU recommendations, it remains investigational in other settings. The National Comprehensive Cancer Network Prostate Cancer Guidelines (2026.V4) [10] continue to regard ePLND as the reference standard and have not yet incorporated SLNB into routine recommendations. This discrepancy contributes to regional variations in clinical practice: SLNB is routinely performed in selected specialized centers in Europe and Australia, remains largely confined to research protocols in North America, and shows variable adoption in Asia and Oceania depending on local expertise. Inconsistent guideline recommendations hinder the development of unified training standards and limit widespread implementation. Although SLNB has

demonstrated high sensitivity for LNM detection in selected studies (up to 95.2%), with comparable accuracy to ePLND in these cohorts [40, 48], the lack of standardized protocols means that expert consensus still recommends ePLND as the clinical first standard, with SLNB used as an adjunct to improve staging accuracy [51, 52]. SLNB detection typically involves two complementary techniques, which may be used individually or in combination. Gamma probes enable detection *via* radioactive signals but have limited sensitivity, whereas fluorescent tracers allow real-time intraoperative visualization but are constrained by shallow tissue penetration [51]. Hybrid imaging, which combines these two modalities, leverages their respective advantages to overcome existing limitations. Recent hybrid imaging integrates SLN mapping with molecular techniques. For example, hybrid tracers such as ICG-<sup>99m</sup>Tc-nanocolloid integrate the advantages of nuclear and fluorescence imaging, providing a minimally invasive and reliable method [53]. In addition, portable gamma cameras and single-photon emission CT/CT enable intraoperative mapping and real-time confirmation of complete SLN removal [39]. Robotic-assisted systems further enhance access to deep pelvic nodes [54]. PSMA-PET/CT-guided SLNB has also been proposed for selected patients [55, 56], and the SENSEI gamma probe has demonstrated the ability to detect SLNs beyond standard ePLND templates, enabling more precise staging [57].

Despite these advances, SLNB has notable limitations, particularly variable sensitivity. While the prospective SENTINELLE trial reported high sensitivity (95.4%) [7], gamma probe-assisted SLNB without hybrid tracers achieves sensitivity ranging from 67% to 76%, with high specificity (96%–100%) [58]. The main manifestation of this variability is the missed detection of micrometastases (<2 mm) [15, 59], which can be attributed to three main factors: (1) disrupted lymphatic drainage due to tumor obstruction or prior surgical intervention, reducing tracer accumulation in sentinel LNs; (2) the “shine-through” effect caused by high radioactivity of the primary tumor site, which obscures adjacent nodes; and (3) the absence of standardized tracer dosing and injection protocols, leading to variability in lymphatic mapping results [60].

To address these challenges, several optimization strategies have been proposed: (1) the development of highly sensitive PSMA-targeted dual-modality tracers to improve micrometastasis detection and mitigate the “shine-through” effect; (2) integration of SLNB with intraoperative frozen section analysis to provide real-time pathological assessment [61]; (3) establishment of unified international guidelines and standardized technical protocols; and (4) incorporation of NIR-II fluorescent probes to enhance visualization of deep pelvic sentinel nodes.

## Discussion

This narrative review systematically summarizes the clinical applications, diagnostic performance, and limitations of various imaging modalities for pelvic LNs staging in IR-PCa, focusing on both traditional anatomical imaging and molecular imaging approaches. As shown in **Table 1**, the diagnostic accuracy of imaging modalities for nodal staging in IR-PCa has progressively improved with the transition from conventional anatomical imaging to molecular imaging. This evolution underscores that precise identification of metastatic LNs is a critical determinant of accurate staging and individualized management in IR-PCa. Notably, molecular imaging modalities—particularly PSMA-PET—and intraoperative techniques, such as FGS and SLNB, demonstrate superior diagnostic performance due to their molecular targeting capabilities. However, SLNB and FGS currently exhibit considerable inter-institutional variability in procedural protocols and lack standardized technical implementation; therefore, considering them equivalent alternatives to ePLND remains premature. These findings not only confirm the potential of molecular imaging to overcome the limitations of traditional imaging but also provide important technical support for addressing the clinical challenges of nodal staging in IR-PCa. Collectively, they establish the foundation for the multimodal staging strategy proposed in this review and support optimization of clinical decision-making.

Based on a review of existing evidence, we propose a multimodal nodal staging strategy integrating three key components, closely aligned with clinical practice and forming a closed-loop feedback system targeting the heterogeneous IR-PCa population: (1) preoperative risk stratification of patients with IR-PCa using traditional imaging combined with PSMA-PET/CT to distinguish favorable and unfavorable subgroups, with active surveillance recommended for the favorable subgroup and intraoperative intervention for the unfavorable subgroup; (2) intraoperative real-time targeting using FGS and hybrid-tracer SLNB to achieve precise localization and dissection of LNM in the unfavorable IR-PCa subgroup; and (3) intraoperative re-evaluation and real-time feedback to establish a closed-loop treatment strategy—adjusting intraoperative FGS as needed to ensure precise localization, determining whether to perform PLND based on intraoperative findings to enable individualized treatment, and supporting postoperative active surveillance (**Fig. 2**).

This multimodal strategy supports effective risk management by reducing unnecessary ePLND while maintaining diagnostic accuracy. Consequently, it may decrease surgical morbidity without compromising oncologic outcomes. It is particularly well suited to IR-PCa, where distinguishing between favorable and unfavorable subgroups is essential for appropriate treatment selection [7, 10, 11].

In summary, the proposed multimodal strategy for clinical application in IR-PCa includes the following: (1) Target population: patients with IR-PCa; (2) Economic impact: potential reduction in long-term costs by avoiding complications associated with overtreatment and unnecessary ePLND; (3) Advantages: addresses IR-PCa heterogeneity and integrates into routine clinical workflows; (4) Limitations: dependence on specialized equipment, lack of standardized multicenter protocols, operator variability, challenges in multidisciplinary intraoperative coordination, and limited long-term outcome data; and (5) Clinical implementation: feasible in well-equipped centers, but widespread adoption requires standardized protocols and multicenter validation.

### **Limitations and Future Directions**

#### **Limitations**

This review has several limitations. First, the pathological gold standard for pelvic LN staging in IR-PCa remains ePLND. However, this review primarily focuses on molecular imaging-based staging techniques and does not provide an in-depth discussion of the synergistic use of ePLND with molecular imaging, nor does it comprehensively address other staging approaches not covered here. Second, as a narrative review, it summarizes a selected subset of relevant literature to highlight advances in molecular imaging rather than attempting an exhaustive synthesis; therefore, subtle differences among all available studies may not be fully captured. Third, molecular imaging techniques are rapidly evolving, and some ongoing or unpublished studies may not be included. Fourth, this review focuses on diagnostic accuracy by design; given limited evidence, clinical outcomes including survival, quality of life, and patient-reported outcomes are not addressed.

#### **Future Directions**

While this review focuses on the diagnostic accuracy of multimodal nodal staging, its broader clinical utility requires validation in terms of oncologic outcomes, quality of life, and patient-reported outcomes. Current evidence directly linking multimodal staging strategies to these endpoints remains limited, and well-designed prospective studies are needed to establish these associations. To advance the clinical translation and technological development of molecular imaging in IR-PCa nodal staging, the key future priorities for relevant technologies are summarized as follows: (1) Probe Engineering: Development of next-generation molecular probes for improved intraoperative micrometastasis detection; (2) Integrated Strategy Validation: Prospective multicenter trials evaluating PSMA-PET/CT-guided SLNB to standardize lymphadenectomy approaches; (3) FGS Protocol quantification: Establishment of diagnostic accuracy benchmarks through large-cohort comparisons of FGS and ePLND outcomes; (4) Health economics evaluation: Comparative analyses of costs and long-term benefits between imaging-guided surgery and standard ePLND; (5) Multimodal Data Integration Systems: Development of real-time surgical guidance platforms integrating preoperative risk assessment, intraoperative fluorescence quantification, and robotic instrument tracking to enable adaptive surgical decision-making; and (6) Training and Standardization: Establishment of standardized protocols and structured training programs for surgeons and radiologists to ensure consistent implementation across institutions.

#### **Conclusion**

In conclusion, this narrative review summarizes the diagnostic performance of various imaging modalities for pelvic LN staging in IR-PCa. Molecular imaging techniques demonstrate superior accuracy compared with traditional anatomical imaging. The proposed multimodal nodal staging strategy effectively addresses the challenges posed by the heterogeneity of IR-PCa and provides a framework to support individualized clinical decision-making. However, widespread clinical adoption of this strategy will require standardized protocols and validation through multicenter studies.

## Statements

### Conflict of Interest Statement

The authors have no competing interests

### Funding Sources

This narrative review was supported by the Shaanxi Provincial Key Research and Development Program (No. S2025-YF-YBSF-0349). The funder had no role in the design, writing, or decision to publish this article.

### Author Contributions

Banchao Shen conceived the idea of this review, conducted the literature search and formal analysis, and drafted the original manuscript; Fuli Wang provided supervision and resources, and critically revised the manuscript for important intellectual content. Both authors read and approved the final manuscript.

## References

1. Kratzer TB, Mazzitelli N, Star J, Dahut WL, Jemal A, Siegel RL. Prostate cancer statistics, 2025. *CA Cancer J Clin*. 2025 Nov-Dec;75(6):485-497. doi: 10.3322/caac.70028.
2. Culp MB, Soerjomataram I, Efstathiou JA, Bray F, Jemal A. Recent Global Patterns in Prostate Cancer Incidence and Mortality Rates. *Eur Urol*. 2020 Jan;77(1):38-52. doi: 10.1016/j.eururo.2019.08.005.
3. Vaccarella S, Li M, Bray F, Kvale R, Serraino D, Lorenzoni V, et al. Prostate cancer incidence and mortality in Europe and implications for screening activities: population based study. *BMJ*. 2024 Sep 4;386:e077738. doi: 10.1136/bmj-2023-077738.
4. Vis AN, Meijer D, Roberts MJ, Siriwardana AR, Morton A, Yaxley JW, et al. Development and External Validation of a Novel Nomogram to Predict the Probability of Pelvic Lymph-node Metastases in Prostate Cancer Patients Using Magnetic Resonance Imaging and Molecular Imaging with Prostate-specific Membrane Antigen Positron Emission Tomography. *Eur Urol Oncol*. 2023 Dec;6(6):553-563. doi: 10.1016/j.euo.2023.03.01.
5. Eastham JA, Auffenberg GB, Barocas DA, Chou R, Crispino T, Davis JW, et al. Clinically Localized Prostate Cancer: AUA/ASTRO Guideline, Part II: Principles of Active Surveillance, Principles of Surgery, and Follow-Up. *J Urol*. 2022 Jul;208(1):19-25. doi: 10.1097/JU.0000000000002758.
6. Cornford P, van den Bergh RCN, Briers E, Van den Broeck T, Brunckhorst O, Darragh J, et al. EAU-EANM-ESTRO-ESUR-ISUP-SIOG Guidelines on Prostate Cancer-2024 Update. Part I: Screening, Diagnosis, and Local Treatment with Curative Intent. *Eur Urol*. 2024 Apr 12:S0302-2838(24)02254-1. doi: 10.1016/j.eururo.2024.03.027.
7. European Association of Urology (EAU). Prostate cancer: Diagnostic evaluation. Available at: <https://uroweb.org/guidelines/prostate-cancer/chapter/diagnostic-evaluation>. Accessed January 10, 2026.
8. Porcaro AB, Panunzio A, Orlando R, Montanaro F, Baielli A, Artoni F, et al. The 2012 Briganti nomogram not only predicts lymph node involvement but also disease progression in surgically treated intermediate-risk prostate cancer patients with PSA <10 ng/mL, ISUP grade group 3, and clinical stage up to cT2b. *Int Braz J Urol*. 2024 Jul-Aug;50(4):450-458. doi: 10.1590/S1677-5538.IBJU.2024.0003.
9. Kane CJ, Eggener SE, Shindel AW, Andriole GL. Variability in Outcomes for Patients with Intermediate-risk Prostate Cancer (Gleason Score 7, International Society of Urological Pathology Gleason Group 2-3) and Implications for Risk Stratification: A Systematic Review. *Eur Urol Focus*. 2017 Oct;3(4-5):487-497. doi: 10.1016/j.euf.2016.10.010.
10. National Comprehensive Cancer Network. NCCN Clinical Practice Guidelines in Oncology (NCCN Guidelines): Prostate Cancer. Version 4.2026. Available at: <https://www.nccn.org/guidelines/guidelines-detail?category=1&id=1459>. Accessed January 10, 2026.
11. Gandaglia G, Ploussard G, Valerio M, Mattei A, Fiori C, Fossati N, et al. A Novel Nomogram to Identify Candidates for Extended Pelvic Lymph Node Dissection Among Patients with Clinically Localized Prostate

- Cancer Diagnosed with Magnetic Resonance Imaging-targeted and Systematic Biopsies. *Eur Urol*. 2019 Mar;75(3):506-514. doi: 10.1016/j.eururo.2018.10.012.
12. Valentin B, Arsov C, Ullrich T, Demetrescu D, Morawitz J, Al-Monajjed R, et al. Comparison of 3 T mpMRI and pelvic CT examinations for detection of lymph node metastases in patients with prostate cancer. *Eur J Radiol*. 2022 Feb;147:110110. doi: 10.1016/j.ejrad.2021.110110.
  13. Malaspina S, Anttinen M, Taimen P, Jambor I, Sandell M, Rinta-Kiikka I, et al. Prospective comparison of <sup>18</sup>F-PSMA-1007 PET/CT, whole-body MRI and CT in primary nodal staging of unfavourable intermediate- and high-risk prostate cancer. *Eur J Nucl Med Mol Imaging*. 2021 Aug;48(9):2951-2959. doi: 10.1007/s00259-021-05296-1.
  14. Esen T, Falay O, Tarim K, Armutlu A, Koseoglu E, Kilic M, et al. <sup>68</sup>Ga-PSMA-11 Positron Emission Tomography/Computed Tomography for Primary Lymph Node Staging Before Radical Prostatectomy: Central Review of Imaging and Comparison with Histopathology of Extended Lymphadenectomy. *Eur Urol Focus*. 2021 Mar;7(2):288-293. doi: 10.1016/j.euf.2021.01.004.
  15. Gandaglia G, Mazzone E, Stabile A, Pellegrino A, Cucchiara V, Barletta F, et al. Prostate-specific membrane antigen Radioguided Surgery to Detect Nodal Metastases in Primary Prostate Cancer Patients Undergoing Robot-assisted Radical Prostatectomy and Extended Pelvic Lymph Node Dissection: Results of a Planned Interim Analysis of a Prospective Phase 2 Study. *Eur Urol*. 2022 Oct;82(4):411-418. doi: 10.1016/j.eururo.2022.06.002.
  16. Tummala M, McNicoll L. Using Life Stories to Support Patient-Centered Care: A Narrative Review of Implementation and Impact. *J Gen Intern Med*. 2026 Jan;41(1):187-196. doi: 10.1007/s11606-025-09746-6.
  17. Trabulsi EJ, Rumble RB, Jadvar H, Hope T, Pomper M, Turkbey B, et al. Optimum Imaging Strategies for Advanced Prostate Cancer: ASCO Guideline. *J Clin Oncol*. 2020 Jun 10;38(17):1963-1996. doi: 10.1200/JCO.19.02757.
  18. Zhang X, Ma Z. Head-to-head comparison of PSMA PET/CT and mpMRI for detecting biochemical recurrence of prostate cancer: A systematic review and meta-analysis. *Curr Urol*. 2024 Sep;18(3):177-184. doi: 10.1097/CU9.0000000000000242.
  19. Abrams-Pompe RS, Fanti S, Schoots IG, Moore CM, Turkbey B, Vickers AJ, et al. The Role of Magnetic Resonance Imaging and Positron Emission Tomography/Computed Tomography in the Primary Staging of Newly Diagnosed Prostate Cancer: A Systematic Review of the Literature. *Eur Urol Oncol*. 2021 Jun;4(3):370-395. doi: 10.1016/j.euo.2020.11.002.
  20. Teymouri A, Khonji MS, Alaghi P, Azadnajafabad S, Teymouri A, Delazar S. Diagnostic accuracy of MRI radiomics in predicting lymph node metastasis in prostate cancer: A systematic review. *Eur J Radiol Open*. 2025 Jul 28;15:100673. doi: 10.1016/j.ejro.2025.100673.
  21. Meijer D, van Leeuwen PJ, Roberts MJ, Siriwardana AR, Morton A, Yaxley JW, et al. External Validation and Addition of Prostate-specific Membrane Antigen Positron Emission Tomography to the Most Frequently Used Nomograms for the Prediction of Pelvic Lymph-node Metastases: an International Multicenter Study. *Eur Urol*. 2021 Aug;80(2):234-242. doi: 10.1016/j.eururo.2021.05.006.
  22. Jochumsen MR, Bouchelouche K. PSMA PET/CT for Primary Staging of Prostate Cancer-An Updated Overview. *Semin Nucl Med*. 2024 Jan;54(1):39-45. doi: 10.1053/j.semnuclmed.2023.07.001.
  23. Bach-Gansmo T, Nanni C, Nieh PT, Zannoni L, Bogsrud TV, Sletten H, et al. Multisite Experience of the Safety, Detection Rate and Diagnostic Performance of Fluciclovine (<sup>18</sup>F) Positron Emission Tomography/Computerized Tomography Imaging in the Staging of Biochemically Recurrent Prostate Cancer. *J Urol*. 2017 Mar;197(3 Pt 1):676-683. doi: 10.1016/j.juro.2016.09.117.
  24. Hofman MS, Lawrentschuk N, Francis RJ, Tang C, Vela I, Thomas P, Rutherford N, et al.; proPSMA Study Group Collaborators. Prostate-specific membrane antigen PET-CT in patients with high-risk prostate cancer before curative-intent surgery or radiotherapy (proPSMA): a prospective, randomised, multicentre study. *Lancet*. 2020 Apr 11;395(10231):1208-1216. doi: 10.1016/S0140-6736(20)30314-7.
  25. Hope TA, Eiber M, Armstrong WR, Juarez R, Murthy V, Lawhn-Heath C, et al. Diagnostic Accuracy of <sup>68</sup>Ga-PSMA-11 PET for Pelvic Nodal Metastasis Detection Prior to Radical Prostatectomy and Pelvic Lymph Node Dissection: A Multicenter Prospective Phase 3 Imaging Trial. *JAMA Oncol*. 2021 Nov 1;7(11):1635-1642. doi: 10.1001/jamaoncol.2021.3771.
  26. Ingvar J, Hvittfeldt E, Trägårdh E, Simoulis A, Bjartell A. Assessing the accuracy of [<sup>18</sup>F]PSMA-1007 PET/CT for primary staging of lymph node metastases in intermediate- and high-risk prostate cancer patients. *EJNMMI Res*. 2022 Aug 9;12(1):48. doi: 10.1186/s13550-022-00918-7.

27. Fendler WP, Eiber M, Beheshti M, Bomanji J, Calais J, Ceci F, et al. PSMA PET/CT: joint EANM procedure guideline/SNMMI procedure standard for prostate cancer imaging 2.0. *Eur J Nucl Med Mol Imaging*. 2023 Apr;50(5):1466-1486. doi: 10.1007/s00259-022-06089-w.
28. Moreira LF, Mussi TC, Cunha MLD, Filippi RZ, Baroni RH. Accuracy of <sup>68</sup>Ga-PSMA PET/CT for lymph node and bone primary staging in prostate cancer. *Urol Oncol*. 2022 Mar;40(3):104.e17-104.e21. doi: 10.1016/j.urolonc.2021.11.007.
29. Pepe P, Pepe L, Fiorentino V, Curduman M, Pennisi M, Fraggetta F. PSMA PET/CT Accuracy in Diagnosing Prostate Cancer Nodes Metastases. *In Vivo*. 2024 Nov-Dec;38(6):2880-2885. doi: 10.21873/invivo.13769.
30. Oprea-Lager DE, MacLennan S, Bjartell A, Briganti A, Burger IA, de Jong I, et al. European Association of Nuclear Medicine Focus 5: Consensus on Molecular Imaging and Theranostics in Prostate Cancer. *Eur Urol*. 2024 Jan;85(1):49-60. doi: 10.1016/j.eururo.2023.09.003.
31. Xie D, Gu D, Lei M, Cai C, Zhong W, Qi D, et al. The application of indocyanine green in guiding prostate cancer treatment. *Asian J Urol*. 2023 Jan;10(1):1-8. doi: 10.1016/j.ajur.2021.07.004.
32. Jiang Y, Pu K. Molecular Probes for Autofluorescence-Free Optical Imaging. *Chem. Rev*. 2021, 121, 13086–13131. doi: 10.1021/acs.chemrev.1c00506.
33. Kothapalli SR, Sonn GA, Choe JW, Nikoozadeh A, Bhuyan A, Park KK, et al. Simultaneous transrectal ultrasound and photoacoustic human prostate imaging. *Sci Transl Med*. 2019 Aug 28;11(507):eaav2169. doi: 10.1126/scitranslmed.aav2169.
34. Chennamsetty A, Zhumkhawala A, Tobis SB, Ruel N, Lau CS, Yamzon J, et al. Lymph Node Fluorescence During Robot-Assisted Radical Prostatectomy With Indocyanine Green: Prospective Dosing Analysis. *Clin Genitourin Cancer*. 2017 Aug;15(4):e529-e534. doi: 10.1016/j.clgc.2016.10.014.
35. Nguyen HG, van den Berg NS, Antaris AL, Xue L, Greenberg S, Rosenthal JW, et al. First-in-human Evaluation of a Prostate-specific Membrane Antigen-targeted Near-infrared Fluorescent Small Molecule for Fluorescence-based Identification of Prostate Cancer in Patients with High-risk Prostate Cancer Undergoing Robotic-assisted Prostatectomy. *Eur Urol Oncol*. 2024 Feb;7(1):63-72. doi: 10.1016/j.euo.2023.07.004.
36. Stibbe JA, de Barros HA, Linders DGJ, Bhairosingh SS, Bekers EM, van Leeuwen PJ, et al. First-in-patient study of OTL78 for intraoperative fluorescence imaging of prostate-specific membrane antigen-positive prostate cancer: a single-arm, phase 2a, feasibility trial. *Lancet Oncol*. 2023 May;24(5):457-467. doi: 10.1016/S1470-2045(23)00102-X.
37. Harke NN, Godes M, Wagner C, Addali M, Fangmeyer B, Urbanova K, et al. Fluorescence-supported lymphography and extended pelvic lymph node dissection in robot-assisted radical prostatectomy: a prospective, randomized trial. *World J Urol*. 2018 Nov;36(11):1817-1823. doi: 10.1007/s00345-018-2330-7.
38. Hruby S, Englberger C, Lusuardi L, Schätz T, Kunit T, Abdel-Aal AM, et al. Fluorescence Guided Targeted Pelvic Lymph Node Dissection for Intermediate and High Risk Prostate Cancer. *J Urol*. 2015 Aug;194(2):357-63. doi: 10.1016/j.juro.2015.03.127.
39. Gondoputro W, Scheltema MJ, Blazeovski A, Doan P, Thompson JE, Amin A, et al. Robot-Assisted Prostate-Specific Membrane Antigen-Radioguided Surgery in Primary Diagnosed Prostate Cancer. *J Nucl Med*. 2022 Nov;63(11):1659-1664. doi: 10.2967/jnumed.121.263743.
40. Wit EMK, Acar C, Grivas N, Yuan C, Horenblas S, Liedberg F, et al. Sentinel Node Procedure in Prostate Cancer: A Systematic Review to Assess Diagnostic Accuracy. *Eur Urol*. 2017 Apr;71(4):596-605. doi: 10.1016/j.eururo.2016.09.007.
41. Claps F, de Pablos-Rodríguez P, Gómez-Ferrer Á, Mascarós JM, Marengo J, Collado Serra A, et al. Free-indocyanine green-guided pelvic lymph node dissection during radical prostatectomy. *Urol Oncol*. 2022 Nov;40(11):489.e19-489.e26. doi: 10.1016/j.urolonc.2022.08.005.
42. Wu LL, Zhao Q, Wang Q, Zhang Q, Yang F, Zheng B, et al. Membrane dual-targeting probes: A promising strategy for fluorescence-guided prostate cancer surgery and lymph node metastases detection. *Acta Pharm Sin B*. 2023 Mar;13(3):1204-1215. doi: 10.1016/j.apsb.2022.07.018.
43. Chen S, Xu H, Chen X, Shen Q, Chen X, Zhang M, et al. First-in-human Study of a Dual-modality Prostate-specific Membrane Antigen-targeted Probe for Preoperative Positron Emission Tomography/Computed Tomography Imaging and Intraoperative Fluorescence Imaging in Prostate Cancer. *Eur Urol*. 2025 Jun;87(6):717-727. doi: 10.1016/j.eururo.2025.03.010.
44. Chan MH, Chang YC. Recent advances in near-infrared I/II persistent luminescent nanoparticles for biosensing and bioimaging in cancer analysis. *Anal Bioanal Chem*. 2024 Jul;416(17):3887-3905. doi: 10.1007/s00216-024-05267-z.

45. Kubeil M, Martínez IIS, Bachmann M, Kopka K, Tuck KL, Stephan H. Dual-Labeling Strategies for Nuclear and Fluorescence Molecular Imaging: Current Status and Future Perspectives. *Pharmaceuticals (Basel)*. 2022 Mar 31;15(4):432. doi: 10.3390/ph15040432.
46. Yuan L, Su Y, Zhang R, Gao J, Yu B, Cong H, et al. NIR-II organic small molecule probe for labeling lymph nodes and guiding tumor imaging. *Talanta*. 2024 Jan 1;266(Pt 2):125123. doi: 10.1016/j.talanta.2023.125123.
47. Isuri RK, Williams J, Rioux D, Dorval P, Chung W, Dancer PA, et al. Clinical Integration of NIR-II Fluorescence Imaging for Cancer Surgery: A Translational Evaluation of Preclinical and Intraoperative Systems. *Cancers (Basel)*. 2025 Aug 17;17(16):2676. doi: 10.3390/cancers17162676.
48. van Leeuwen FWB, Winter A, van Der Poel HG, Eiber M, Suardi N, Graefen M, et al. Technologies for image-guided surgery for managing lymphatic metastases in prostate cancer. *Nat Rev Urol*. 2019 Mar;16(3):159-171. doi: 10.1038/s41585-018-0140-8.
49. Małkiewicz B, Kiełb P, Kobylański M, Karwacki J, Poterek A, Krajewski W, et al. Sentinel Lymph Node Techniques in Urologic Oncology: Current Knowledge and Application. *Cancers (Basel)*. 2023 Apr 26;15(9):2495. doi: 10.3390/cancers15092495.
50. Abascal Junquera JM, Harke NN, Walz JC, Hadaschik B, Adshead J, Everaerts W, et al. A Drop-in Gamma Probe for Minimally Invasive Sentinel Lymph Node Dissection in Prostate Cancer: Preclinical Evaluation and Interim Results From a Multicenter Clinical Trial. *Clin Nucl Med*. 2023 Mar 1;48(3):213-220. doi: 10.1097/RLU.0000000000004557.
51. van Gennep EJ, KleinJan GH, Kuusk T, Verdijk RWA, Wit EMK, van Rhijn BWG, et al. Sentinel lymph node staging in urological cancer surgery: advances in imaging, intra-operative detection and translational research. *BJU Int*. 2025 Dec;136(6):979-989. doi: 10.1111/bju.16848.
52. van der Poel HG, Wit EM, Acar C, van den Berg NS, van Leeuwen FWB, Valdes Olmos RA, et al; Sentinel Node Prostate Cancer Consensus Panel Group members. Sentinel node biopsy for prostate cancer: report from a consensus panel meeting. *BJU Int*. 2017 Aug;120(2):204-211. doi: 10.1111/bju.13810.
53. Wit EMK, KleinJan GH, Berrens AC, van Vliet R, van Leeuwen PJ, Buckle T, et al. A hybrid radioactive and fluorescence approach is more than the sum of its parts; outcome of a phase II randomized sentinel node trial in prostate cancer patients. *Eur J Nucl Med Mol Imaging*. 2023 Jul;50(9):2861-2871. doi: 10.1007/s00259-023-06191-7.
54. Assam I, Dierck SP, Zhao Y, Jüptner M, Siebert FA, Zuhayra M, et al. Evaluation of sentinel lymph node localization in malignant melanoma by preoperative semiconductor gamma camera and planar lymphoscintigraphy. *J Appl Clin Med Phys*. 2023 Aug;24(8):e14077. doi: 10.1002/acm2.14077.
55. Hinsenveld FJ, Wit EMK, van Leeuwen PJ, Brouwer OR, Donswijk ML, Tillier CN, et al. Prostate-specific membrane antigen positron emission tomography/computed tomography combined with sentinel node biopsy for primary lymph node staging in prostate cancer. *J Nucl Med*. 2020 Apr;61(4):540-545. doi: 10.2967/jnumed.119.232199.
56. Fumadó L, Abascal JM, Mestre-Fusco A, Vidal-Sicart S, Aguilar G, Juanpere N, et al. Sentinel Lymph Node Biopsy in Prostate Cancer Patients: Results From an Injection Technique Targeting the Index Lesion in the Prostate Gland. *Front Med (Lausanne)*. 2022 Sep 2;9:931867. doi: 10.3389/fmed.2022.931867.
57. Everaerts W, Walz J, Abascal Junquera JM, Goffin K, Grootendorst MR, van 't Klooster K, et al. A Multicentre Clinical Trial Evaluating a Drop-in Gamma Probe for Minimally Invasive Sentinel Lymph Node Dissection in Prostate Cancer. *Eur Urol Focus*. 2024 Jan;10(1):32-40. doi: 10.1016/j.euf.2023.07.001.
58. Duin JJ, de Barros HA, Donswijk ML, Schaake EE, van der Sluis TM, Wit EMK, et al. The Diagnostic Value of the Sentinel Node Procedure to Detect Occult Lymph Node Metastases in PSMA PET/CT Node-Negative Prostate Cancer Patients. *J Nucl Med*. 2023 Oct;64(10):1563-1566. doi: 10.2967/jnumed.123.265556.
59. Yang X, Wu Q, Jin C, He W, Wang M, Yang T, et al. A novel hand-assisted laparoscopic versus conventional laparoscopic right hemicolectomy for right colon cancer: study protocol for a randomized controlled trial. *Trials*. 2017 Jul 26;18(1):355. doi: 10.1186/s13063-017-2084-3.
60. de Vries LH, Lodewijk L, de Keizer B, Borel Rinkes IH, Vriens MR. Sentinel lymph node detection in thyroid carcinoma using 68Ga-tilmanocept PET/CT: a proof-of-concept study protocol. *Future Oncol*. 2022 Oct;18(31):3493-3499. doi: 10.2217/fon-2022-0165.
61. Bharath S, Sharma D, Yadav SK, Shekhar S, Jha CK. A Systematic Review and Meta-analysis of Touch Imprint Cytology and Frozen Section Biopsy and Their Comparison for Evaluation of Sentinel Lymph Node in Breast Cancer. *World J Surg*. 2023 Feb;47(2):478-488. doi: 10.1007/s00268-022-06800-w.

62. von Below C, Daouacher G, Wassberg C, Grzegorek R, Gestblom C, Sörensen J, et al. Validation of 3 T MRI including diffusion-weighted imaging for nodal staging of newly diagnosed intermediate- and high-risk prostate cancer. *Clin Radiol*. 2016 Apr;71(4):328-34. doi: 10.1016/j.crad.2015.12.001.
63. Nguyenhuy M, Chan XQ, Homewood D, Ogluszko C, Dundee P, Corcoran N. Utility of Multiparametric Prostate MRI to Predict Regional or Distant Metastatic Disease Against Conventional Staging Using CT and Bone Scintigraphy or 68Ga-PSMA PET in Intermediate-to-High-Risk Prostate Cancer. *Cureus*. 2024 Nov 13;16(11):e73607. doi: 10.7759/cureus.73607.
64. Franklin A, Yaxley WJ, Raveenthiran S, Coughlin G, Gianduzzo T, Kua B, et al. Histological comparison between predictive value of preoperative 3-T multiparametric MRI and <sup>68</sup>Ga-PSMA PET/CT scan for pathological outcomes at radical prostatectomy and pelvic lymph node dissection for prostate cancer. *BJU Int*. 2021 Jan;127(1):71-79. doi: 10.1111/bju.15134.
65. Kulkarni SC, Sundaram PS, Padma S. In primary lymph nodal staging of patients with high-risk and intermediate-risk prostate cancer, how critical is the role of Gallium-68 prostate-specific membrane antigen positron emission tomography-computed tomography? *Nucl Med Commun*. 2020 Feb;41(2):139-146. doi: 10.1097/MNM.0000000000001110.
66. Petersen LJ, Nielsen JB, Langkilde NC, Petersen A, Afshar-Oromieh A, De Souza NM, et al. 68Ga-PSMA PET/CT compared with MRI/CT and diffusion-weighted MRI for primary lymph node staging prior to definitive radiotherapy in prostate cancer: a prospective diagnostic test accuracy study. *World J Urol*. 2020 Apr;38(4):939-948. doi: 10.1007/s00345-019-02846-z.
67. Xiong Z, Ge Y, Ma S, Wang Y, Li L, Chao Z, et al. Comparing the diagnostic value of 68Ga-prostate-specific membrane antigen PET/CT and multiparametric MRI in pelvic lymph node metastasis of locally advanced prostate cancer. *Transl Androl Urol*. 2024 Jul 31;13(7):1219-1227. doi: 10.21037/tau-24-15.
68. Eraky A, Tillu N, Ben-David R, Hug B, Jodka H, Agarwal Y, et al. Diagnostic Accuracy of [18F]-DCFPyL Prostate-Specific Membrane Antigen Positron Emission Tomography/Computerized Tomography in Intermediate-Risk Prostate Cancer Undergoing Radical Prostatectomy: Is Pelvic Lymph Node Dissection Still Necessary? *J Urol*. 2025 Oct;214(4):365-373. doi: 10.1097/JU.0000000000004659.
69. Hermsen R, Wedick EBC, Vinken MJM, van Kalmthout LWM, Küsters-Vandeveldel HVN, Wijers CHW, et al. Lymph node staging with fluorine-18 prostate specific membrane antigen 1007-positron emission tomography/computed tomography in newly diagnosed intermediate- to high-risk prostate cancer using histopathological evaluation of extended pelvic node dissection as reference. *Eur J Nucl Med Mol Imaging*. 2022 Sep;49(11):3929-3937. doi: 10.1007/s00259-022-05827-4.
70. Barbosa ARG, Amaral BS, Lourenço DB, Bianco B, Gushiken FA, Apezato M, et al. Accuracy of 68Ga-PSMA PET-CT and PET-MRI in lymph node staging for localized prostate cancer. *Einstein (Sao Paulo)*. 2022 May 16;20:eAO6599. doi: 10.31744/einstein\_journal/2022AO6599.
71. Özkan A, Köseoğlu E, Canda AE, Çil BE, Aykanat İC, Sarıkaya AF, et al. Fluorescence-guided extended pelvic lymphadenectomy during robotic radical prostatectomy. *J Robot Surg*. 2023 Jun;17(3):885-890. doi: 10.1007/s11701-022-01480-z.
72. Shimbo M, Endo F, Matsushita K, Hattori K. Impact of indocyanine green-guided extended pelvic lymph node dissection during robot-assisted radical prostatectomy. *Int J Urol*. 2020 Oct;27(10):845-850. doi: 10.1111/iju.14306.
73. Miki J, Yanagisawa T, Tsuzuki S, Mori K, Urabe F, Kayano S, et al. Anatomical localization and clinical impact of sentinel lymph nodes based on patterns of pelvic lymphatic drainage in clinically localized prostate cancer. *Prostate*. 2018 May;78(6):419-425. doi: 10.1002/pros.23486.
74. Nguyen DP, Huber PM, Metzger TA, Genitsch V, Schudel HH, Thalmann GN. A Specific Mapping Study Using Fluorescence Sentinel Lymph Node Detection in Patients with Intermediate- and High-risk Prostate Cancer Undergoing Extended Pelvic Lymph Node Dissection. *Eur Urol*. 2016 Nov;70(5):734-737. doi: 10.1016/j.eururo.2016.01.034.

## Figure Legends

Fig. 1. Flow diagram of literature search and selection

A comprehensive search of PubMed and the Web of Science Core Collection databases (2015–2025) yielded 445 records. After duplicate removal and sequential screening based on language, study species, study type, thematic relevance, and methodological quality, 61 studies were included in this narrative review.

Fig. 2. Integrative multimodal workflow for lymph node staging in intermediate-risk prostate cancer

Preoperative risk stratification combines conventional imaging and PSMA-PET/CT to identify candidates for intraoperative LN assessment. Intraoperative guidance integrates fluorescence imaging using (NIR-I/II probes), along with robotic SLNB using gamma probes and/or hybrid tracers, to enable real-time LN targeting. The multimodal decision system incorporates intraoperative feedback to reconcile preoperative and intraoperative findings, thereby optimizing individualized pelvic lymph node dissection.

Note: LN = lymph node; NIR = Near-infrared; PSMA-PET/CT = prostate-specific membrane antigen positron emission tomography/computed tomography; SLNB = sentinel lymph node biopsy.

Accepted Manuscript

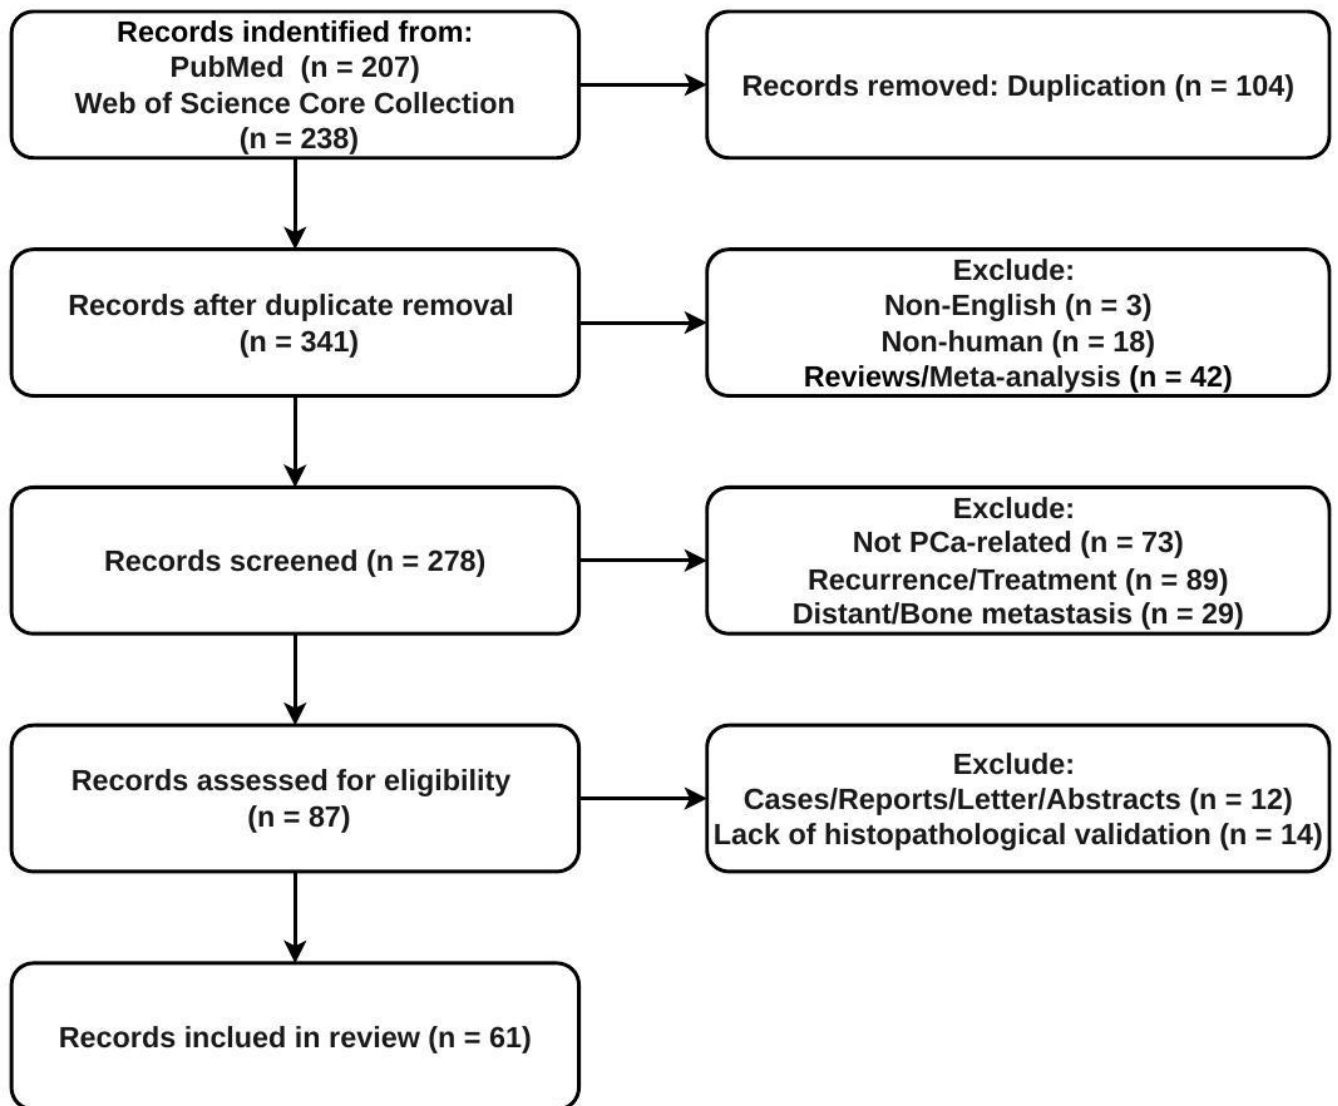

Accepted

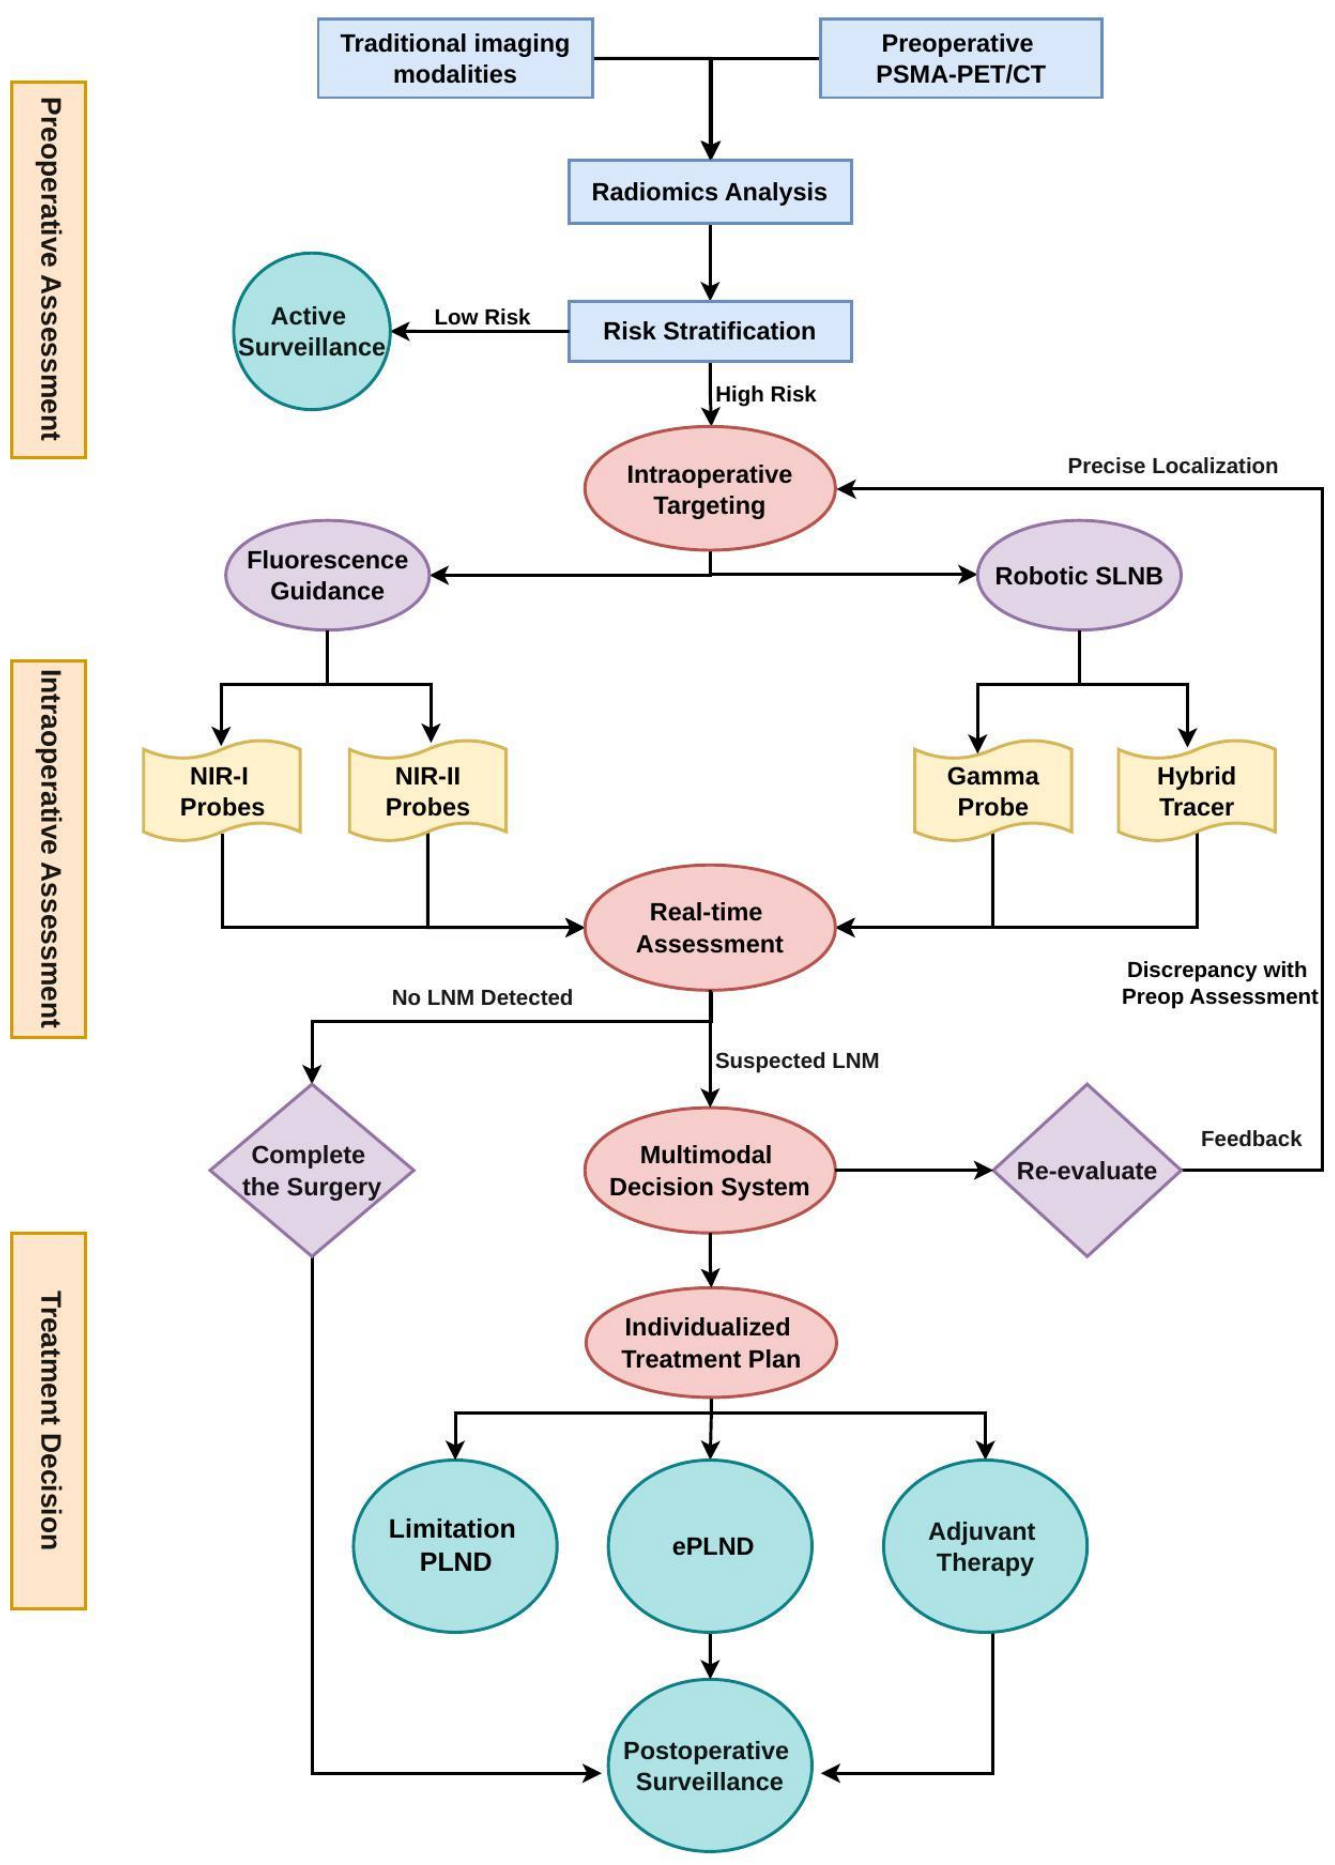

**Table 1** Diagnostic performance characteristics of imaging modalities for lymph node staging in prostate cancer

| Imaging Modality                 | Specific Technique   | Sensitivity (%) | Specificity (%) | Core Advantages                                                                                              | Main Limitations                                                                                         | Evidence Stage                              | Key References                       |
|----------------------------------|----------------------|-----------------|-----------------|--------------------------------------------------------------------------------------------------------------|----------------------------------------------------------------------------------------------------------|---------------------------------------------|--------------------------------------|
| Conventional Imaging             | CT                   | 8.0–33.0        | 97.0–100.0      | Low cost, suitable for whole-body staging.                                                                   | Very low sensitivity; inability to detect micrometastases.                                               | Established clinical practice               | [12, 13, 17]                         |
|                                  | MRI                  | 34.0–61.0       | 90.0–99.0       | Excellent soft tissue contrast; delineates local tumor extent.                                               | Moderate sensitivity; limited specificity for nodal metastasis.                                          | Established clinical practice               | [18, 62, 63]                         |
|                                  | mpMRI                | 37.0–81.0       | 78.9–100.0      | Multiparametric approach improves lesion characterization.                                                   | Morphology-dependent; misses small-volume disease.                                                       | Established clinical practice               | [64, 65, 66]                         |
| Preoperative Molecular Imaging   | PSMA-PET             | 47.7–95.2       | 84.2–100.0      | Strong molecular targeting; higher sensitivity; facilitates accurate preoperative staging.                   | Cost-prohibitive; discordance between preoperative and intraoperative findings; inter-study variability. | High-level clinical evidence                | [23, 28, 29, 65, 66, 67, 68, 69, 70] |
|                                  | FGS, NIR-I           | 62.0–100.0      | 50.0–100.0      | Real-time intraoperative guidance; enhances surgical precision.                                              | Limited penetration (<10 mm); lack of standardization; operator-dependent.                               | Moderate clinical evidence                  | [31, 36, 37, 38, 39, 40]             |
| Intraoperative Molecular Imaging | Dual-modality Probes | NR              | NR              | Bridging preoperative and intraoperative execution; quantitative and real-time guidance.                     | Complex probe manufacturing; radiation safety; limited clinical validation.                              | Exploratory Clinical/Translational Research | N/A                                  |
|                                  | FGS, NIR-II          | NR <sup>a</sup> | NR <sup>a</sup> | Enhanced tissue penetration (>10 mm); reduced scatter; improved deep lesion detection.                       | Preclinical stage; lacks clinical validation and standardization.                                        | Preclinical                                 | N/A                                  |
|                                  | SLNB                 | 34.1–100.0      | 64.8–100.0      | Minimally invasive; may offer accuracy comparable to ePLND in selected patients; reduces surgical morbidity. | Highly variable sensitivity; limited research data; lacks unified clinical standards.                    | Emerging/Investigational                    | [55, 71, 72, 73, 74]                 |

Note: Ranges represent minimum and maximum values reported across studies.

NR = Not Reported; N/A = Not Applicable (no dedicated references for lymph node staging in prostate cancer); CT = computed tomography; MRI = magnetic resonance imaging; PSMA-PET = prostate-specific membrane antigen positron emission tomography; SLNB = sentinel lymph node biopsy; FGS = Fluorescence-guided surgery; NIR-I = Near-infrared-I; NIR-II = Near-infrared-II.

<sup>a</sup> Preclinical studies demonstrate advantages; no clinical data available.

Accepted Manuscript
